# Supplementary material for: Assembly of chromosome-scale contigs by efficiently resolving repetitive sequences with long reads
Source: PubMed Central journal article supplement (PMC6877557; doi:10.1038/s41467-019-13355-3), 2019-11-25
Supplement: 41467_2019_13355_MOESM2_ESM.pdf [file 41467_2019_13355_MOESM2_ESM.pdf]

## **SUPPLEMENTARY INFORMATION**

Assembly of chromosome-scale contigs by efficiently resolving repetitive sequences with long reads

Huilong Du and Chengzhi Liang



**Supplementary Figure 1: Diagrams showing sequence overlaps and read tiling paths and comparison of selected reads with non-selected reads by HERA in a repeat region.**

(a) Two sequences with an overlap. OL, overlap length; OH, overhang length; EL, extension length.

(b)(c) Two repetitive sequences of ~23 kb on R498 chromosome 2 assembled by HERA shared sequence identity of 97.83% that can be distinguished at read level due to sequence variations. The colored bars from IGV (<http://software.broadinstitute.org/software/igv/>) screenshot indicated SNPs between the HERA assembled sequences and the reads. Notably the reads can be classified into two groups that can be distinguished from each other based on the SNP distribution: the reads selected by HERA are originated from the same copy (upper panel) and the reads not selected by HERA are originated from the other repeat copy (lower panel). CANU failed to assemble the two repeats and generated several contigs for each region. (d) Read tiling paths in two repeat copies R1 and R2. Note that a path selected by HERA can start from reads of R1 and end at reads of R2 and vice versa through the reads in the identical region. Thus the number of paths that can be randomly selected ending at either R1 or R2 will be very similar to each other, which causes conflicts in the connection graph.

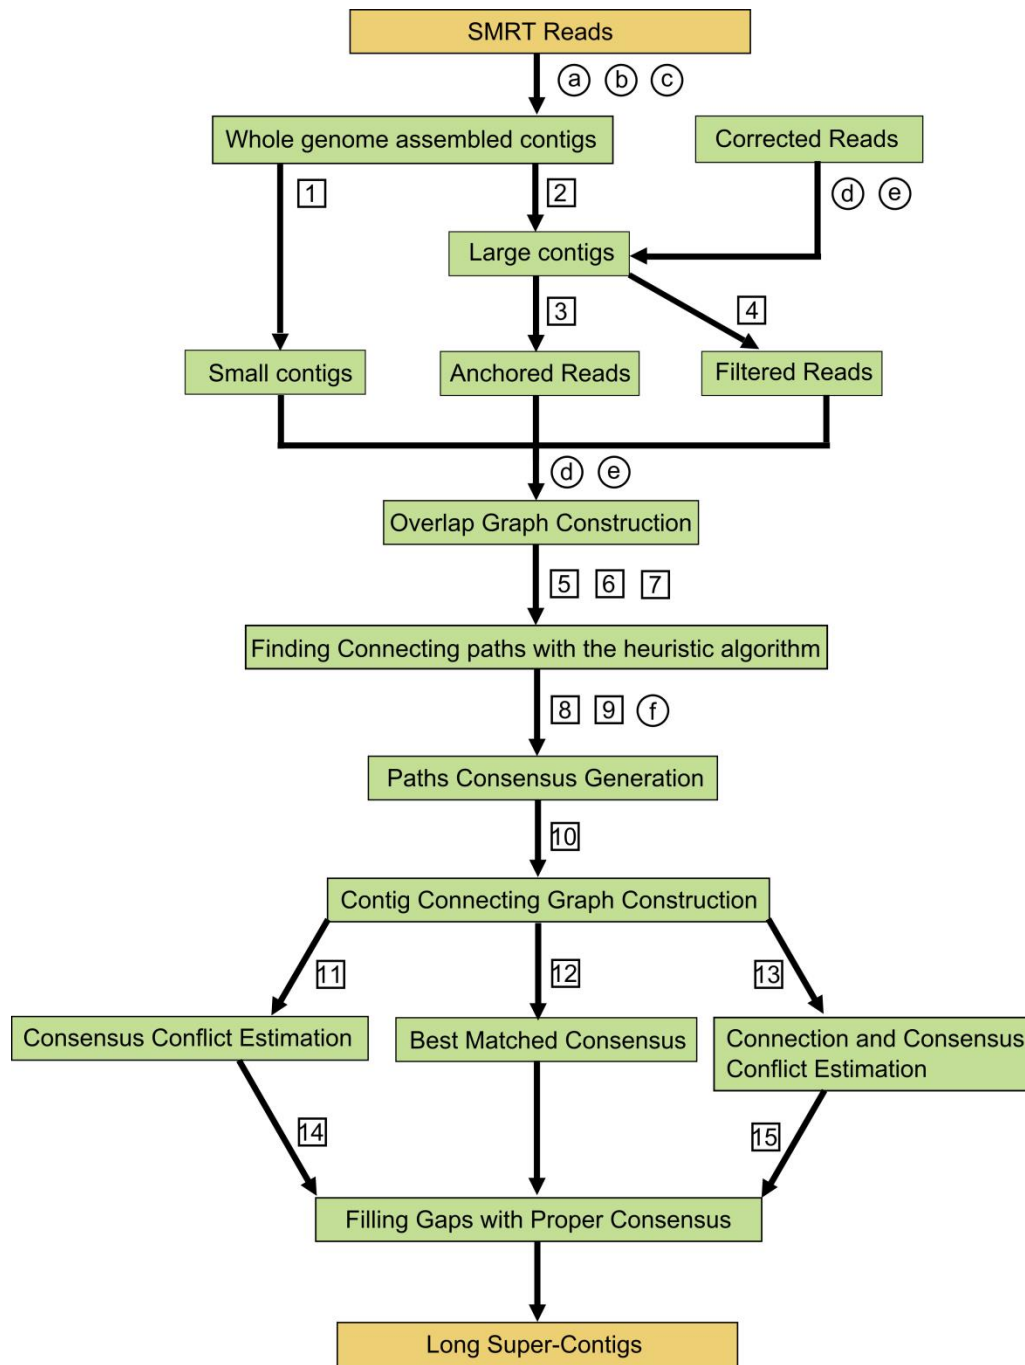

Supplementary Figure 2: Work flow of data process and HERA assembly.

External software: (a) PBcR. (b) CANU. (c) FALCON. (d) MiniMap2. (e) BWA. (f) Daligner.

(1)(2) Selecting sequences by length. (3) Selecting the best matched reads which are aligned to the head or tail of contigs as starting/ending reads. (4) Removing the reads that are completely aligned to the internal region of contigs. (5) Using the highest overlap score for read extension. (6) Using the longest extension length for read extension. (7) A Random Walk approach for read extension. (8)(9)(10) Construction of connection graph. (11) Using the contig grouping information from Hi-C clustering, genetic maps, or reference genomes. (12) Using the gap length information from BioNano genome maps. (13) Not using any additional information. (14) (15) Determining the proper contig pairs based on the conflicting indices and the proper consensus sequences for connection.

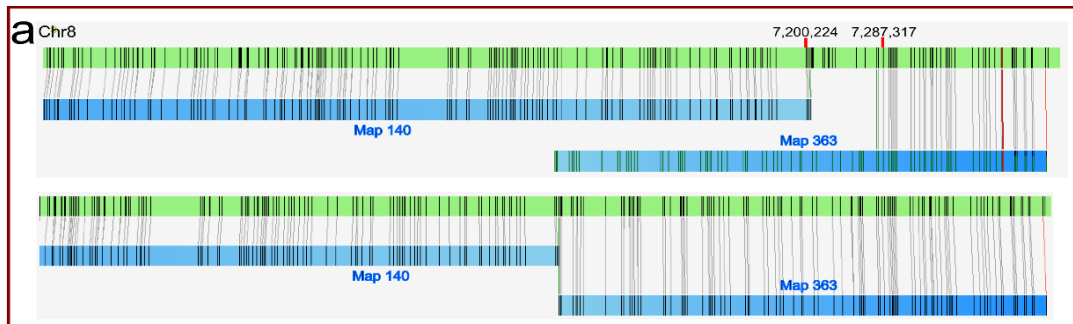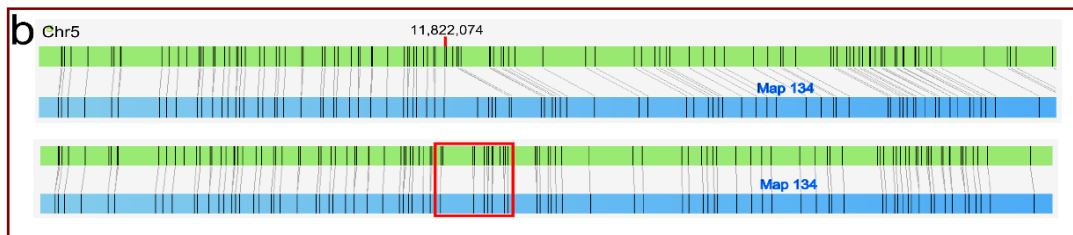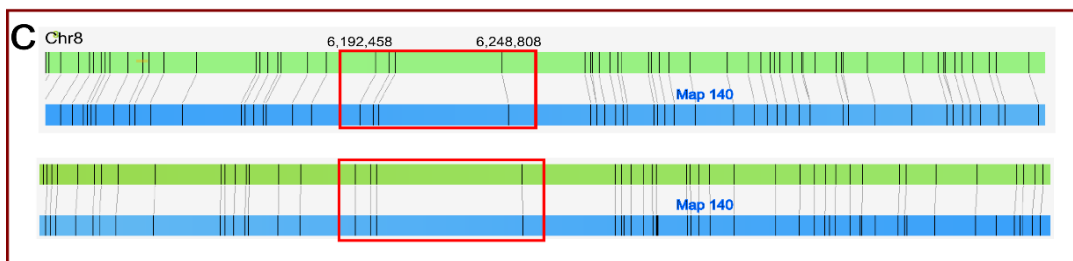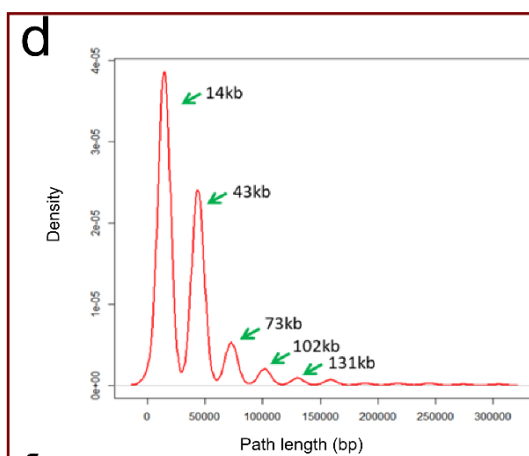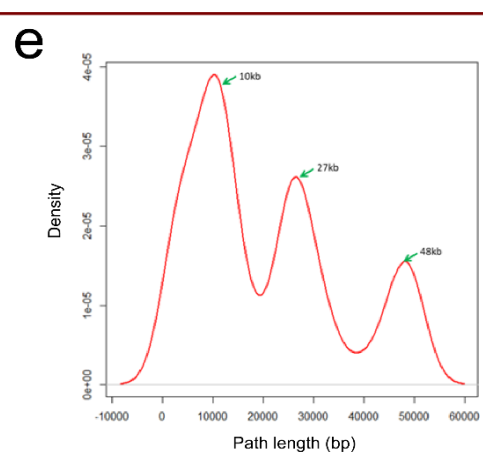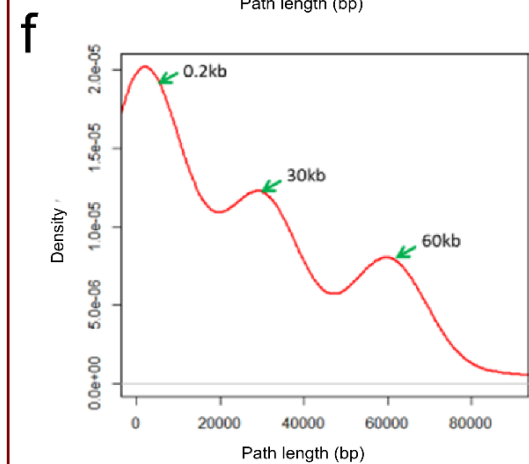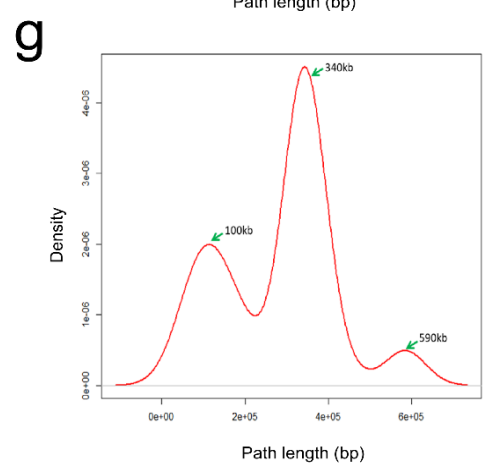

**Supplementary Figure 3: The examples of assembling repetitive regions in R498 by HERA.**

(a) The HERA assembly contained a missing sequence of 387 kb on chromosome 8 in our previously published R498 genome. (b) The assembly of a repetitive region by HERA on chromosome 5 around 11,822,074 bp. (c) The assembly of a repetitive region by HERA on chromosome 8 around 6,195,389 bp. (d-g) Multiple peaks in the connecting path length distribution plots suggested the presence of multiple repeat units. (d) Around 7,986,535 bp on chromosome 1. (e) Around 16,466,293 bp on chromosome 7. (f) Around 6,022,125 bp on chromosome 8. (g) Around 14,965,388 bp on chromosome 9.

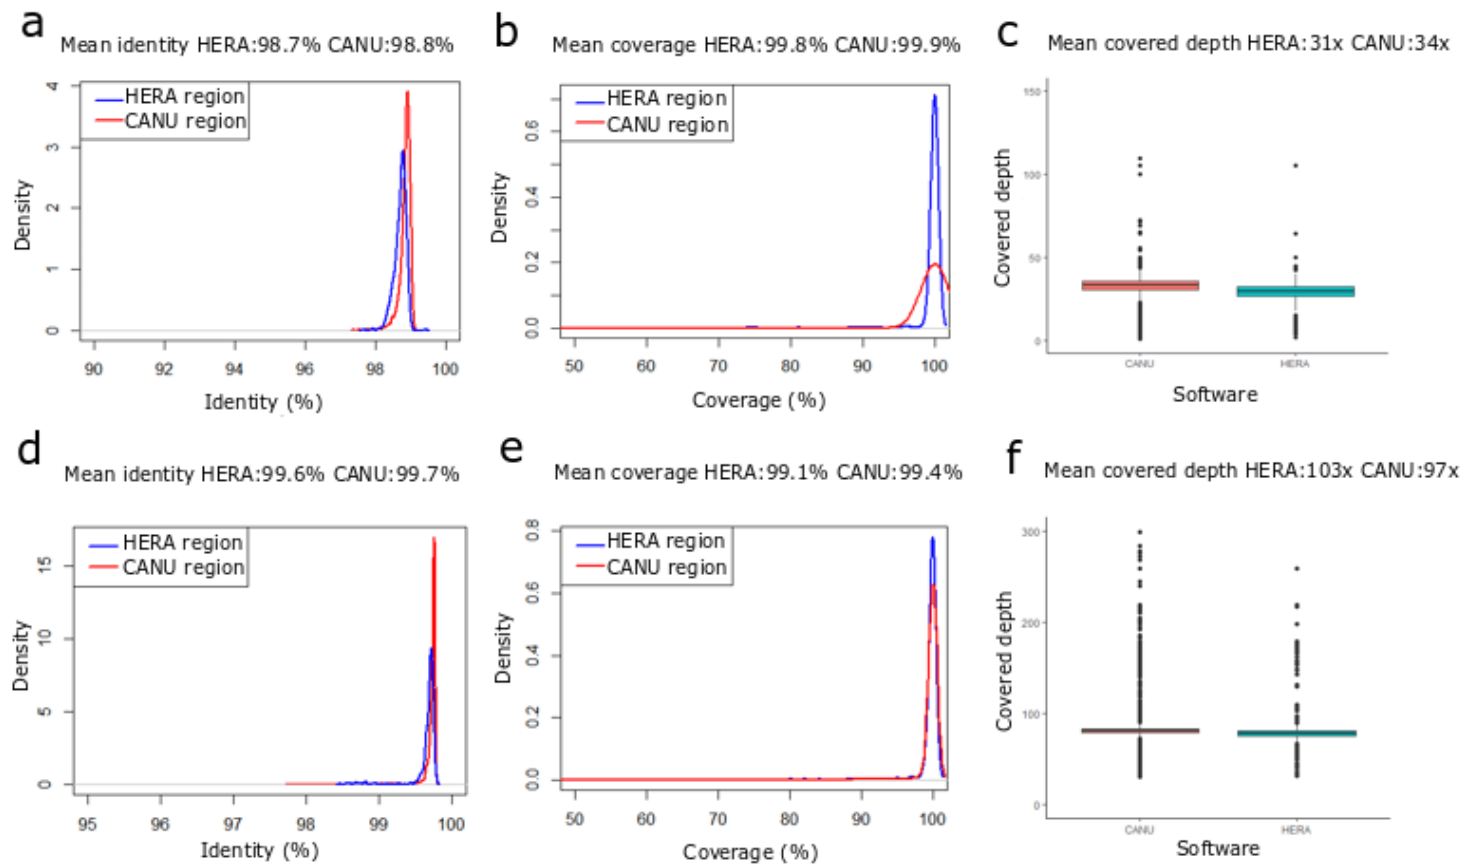

**Supplementary Figure 4: Validation of the nucleotide quality of the HERA assembled sequences in R498 genome.**

The short reads or the self-corrected long reads were aligned to the whole genome. The best match is selected for each read; for multiple mappings with the same score, one is randomly selected. The HERA assembled regions are compared to CANU assembled regions for (a,d) sequence identity, (b,e) sequence coverage, and (c,f) sequencing depth.

(a-c) Long reads. Sequencing depth of the whole genome on average: ~34x. (d-f) Short reads. Sequencing depth of whole genome: ~97x.

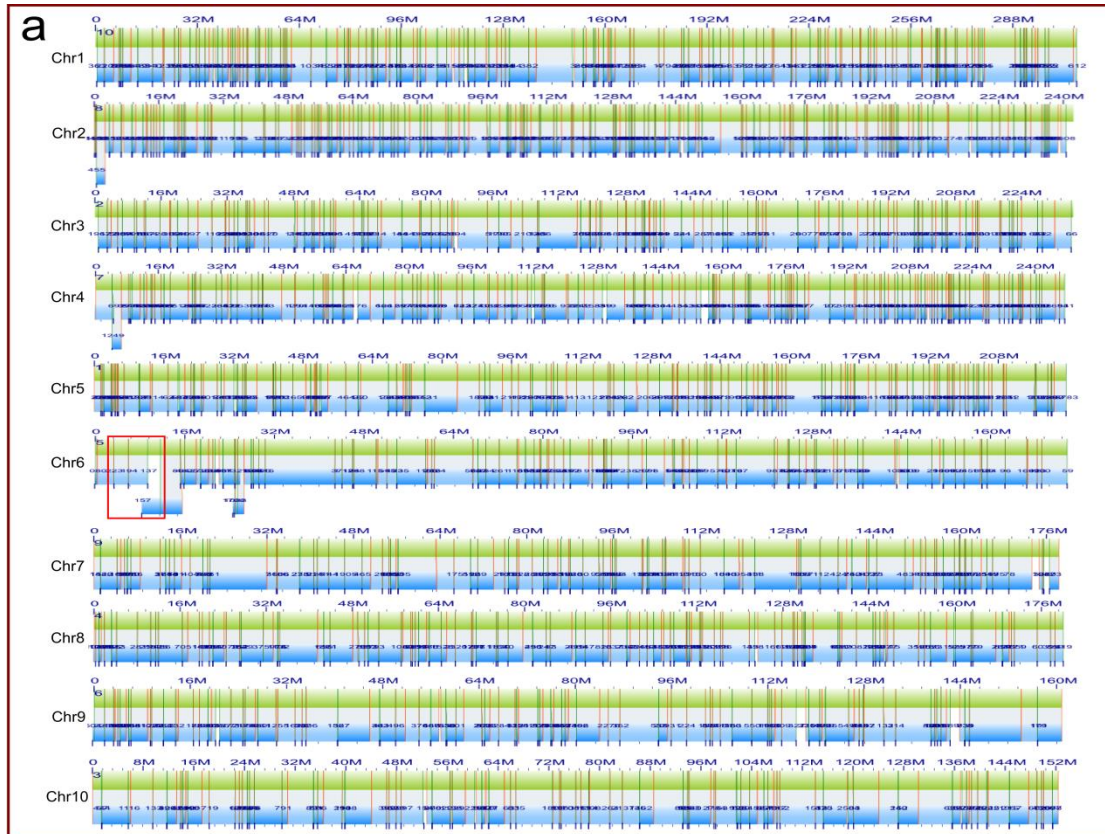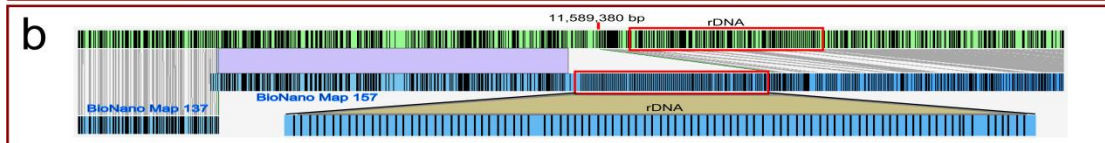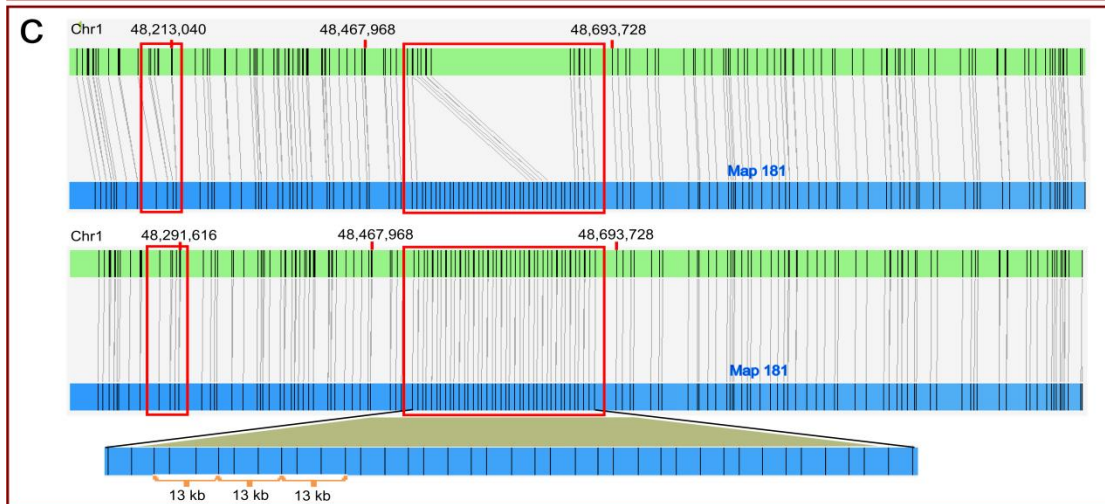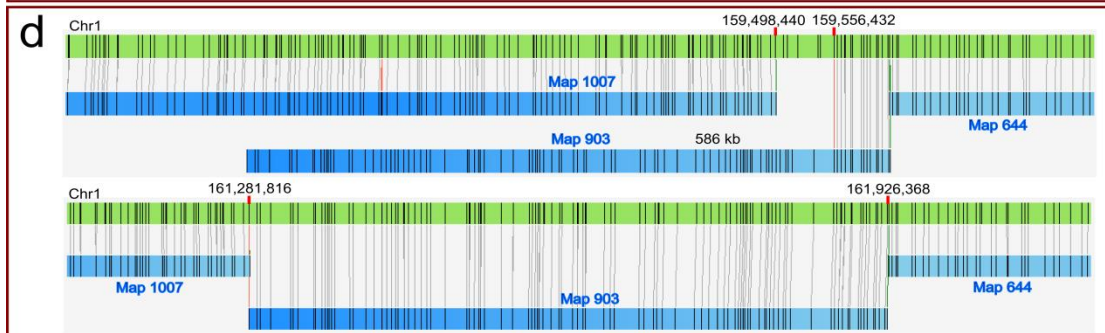



**Supplementary Figure 5: Comparison of HERA constructed maize genome to BioNano maps.**

(a) Comparison of HERA assembly to BioNano maps showed nearly perfect alignment with only one region of visible mismatch (red box). (b) The mismatch shown in (a) was actually an artifact that was caused by a deletion on the right side of the mismatch. The deletion in the HERA contig is caused by a long stretch of tandem repeats of rDNAs. (c) A missing sequence of ~150 kb on chromosome 1 of B73 RefGen\_v4 is a tandem repeat with the unit length of 13 kb (right red box), which were correctly assembled by HERA. A small contig was misplaced in RefGen\_v4 (left red box), which was corrected in the HERA assembly. (d) A missing sequence of ~586 kb on chromosome 1 of B73 RefGen\_v4 was assembled correctly by HERA.

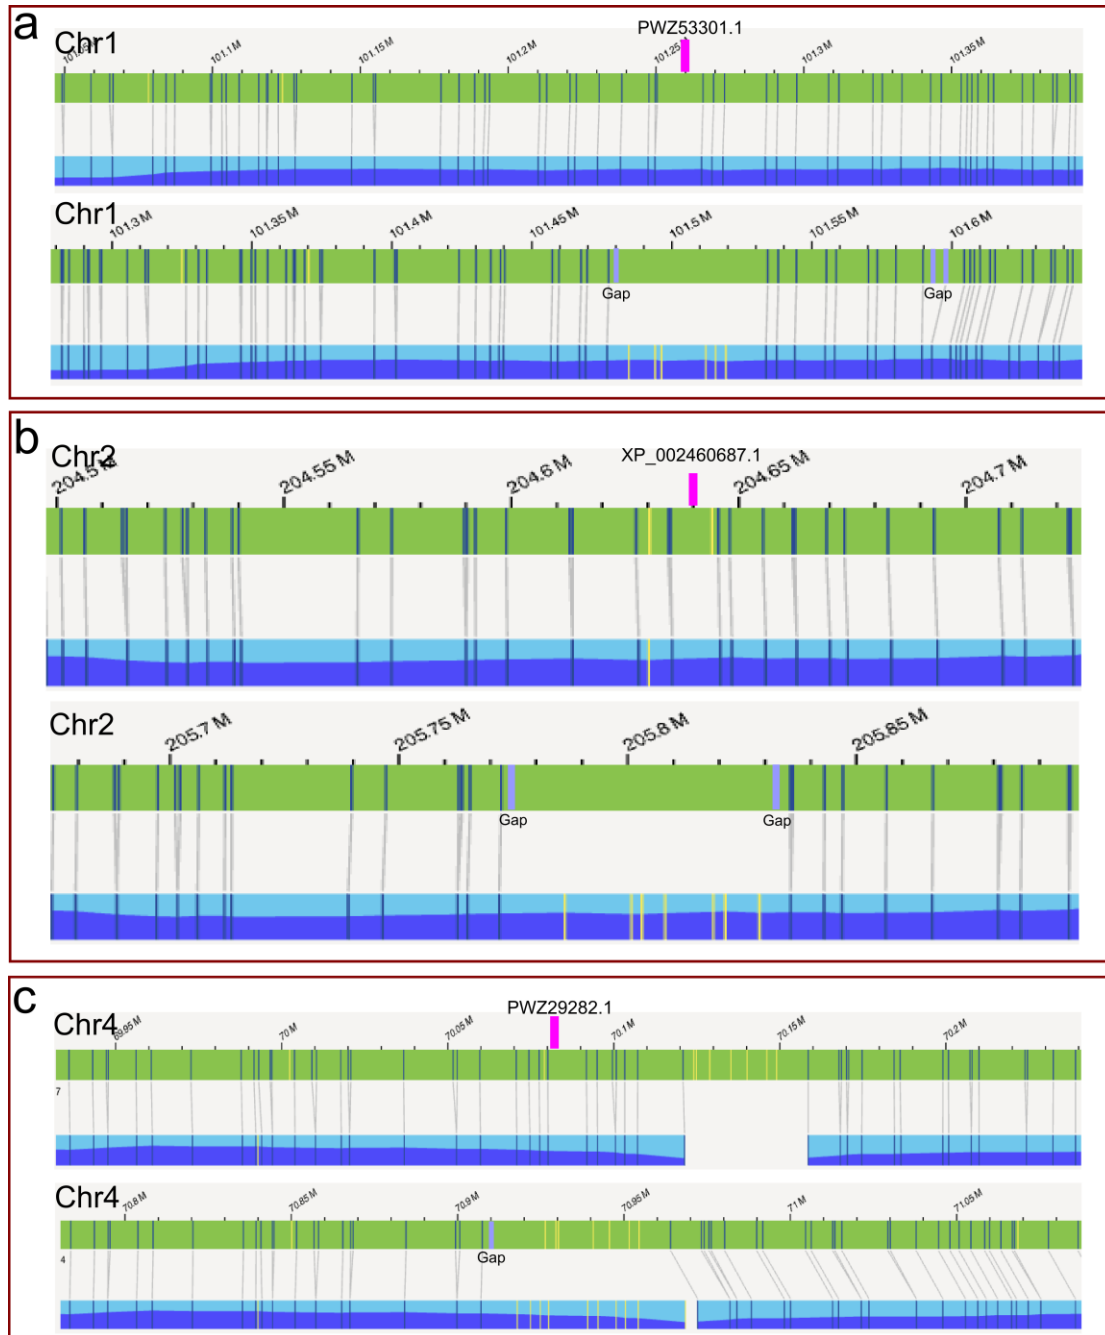

**Supplementary Figure 6: Three important maize genes that were found in HERA assembled B73 sequence but not present in RefGen\_v4.**

The protein sequences of maize genes (their homolog in soghum in parenthesis) **(a)** PWZ53301.1 (XP\_002464891.1), **(b)** ACG34567.1 (XP\_002460687.1), and **(c)** PWZ29282.1 (XP\_002444142.1) were aligned to both B73\_HERA1 (upper panel) and RefGen\_v4 (lower panel) to examine the presence/absence of the genes. Each of the regions including the genes was correctly assembled in B73\_HERA1 but was missing in RefGen\_v4.

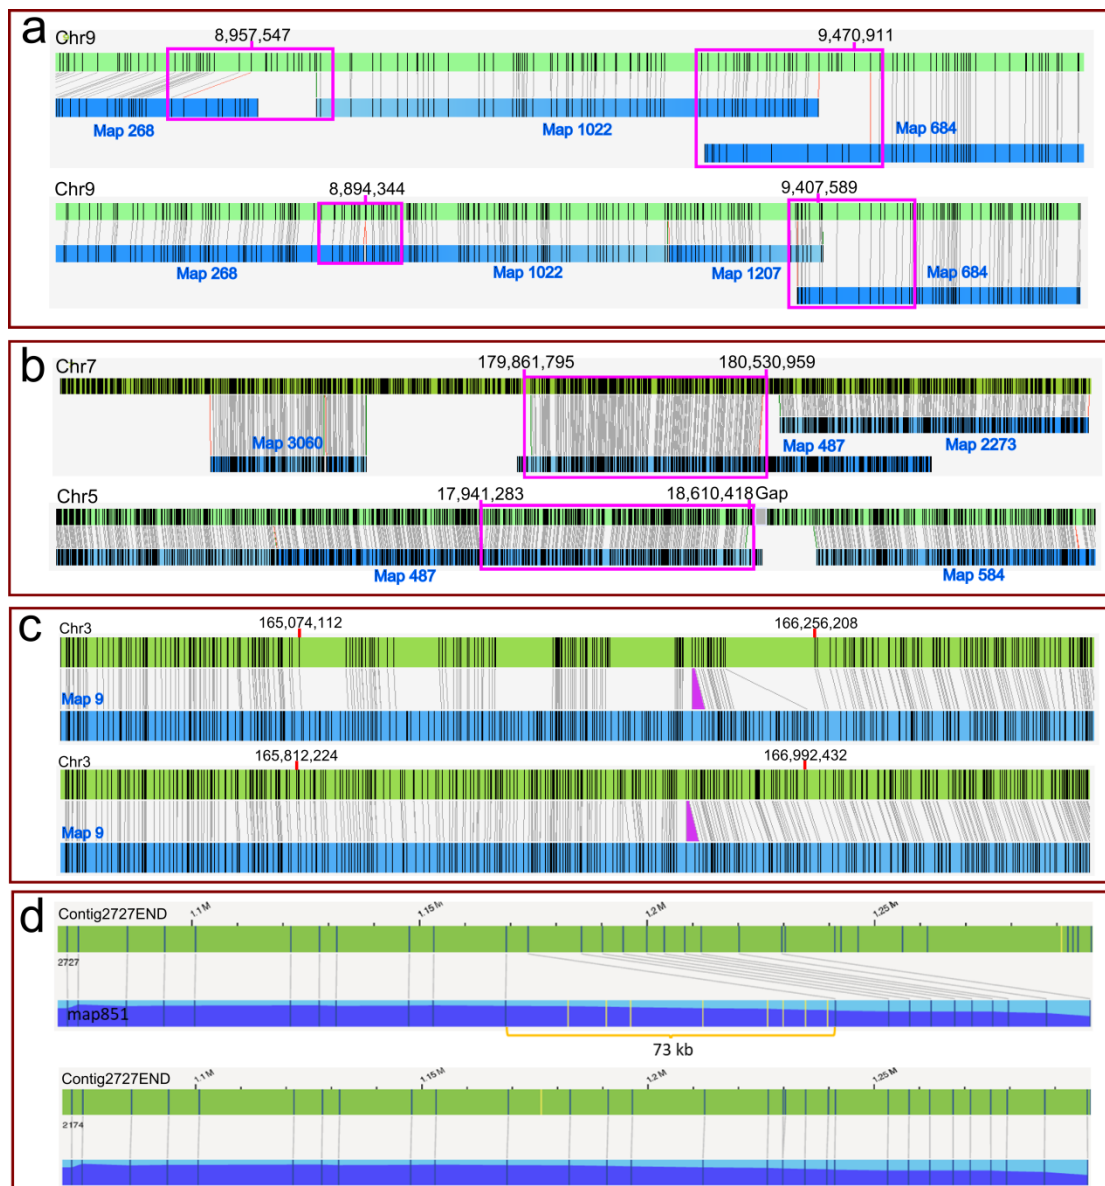

**Supplementary Figure 7: The examples of missing sequences in B73 RefGen\_v4 that were corrected by HERA.**

(a) A region with misoriented and missing sequences on maize chromosome 9 in RefGen\_v4. In the upper panel, two overhangs (63 kb and 360 kb) due to missing sequences were shown in Map 268 and Map 684 (red boxes), with a misoriented sequence of 513 kb in the middle (corresponding to Map 1022). The error was fixed in the HERA assembly (lower panel). (b) A misplaced sequence in RefGen\_v4 caused the BioNano map 487 being partially aligned to two non-adjacent regions in RefGen\_v4 (upper panel). The error was fixed in the HERA assembly (lower panel). (c) A region with five gaps on chromosome 3 of RefGene\_v4 from 165.07 Mb to 166.25 Mb was assembled by HERA. Note that HERA did not try to fix the deletion introduced by PBcR in the purple triangle in (c). (d) HERA fixed a large InDel error in the middle of a contig assembled by PBcR.

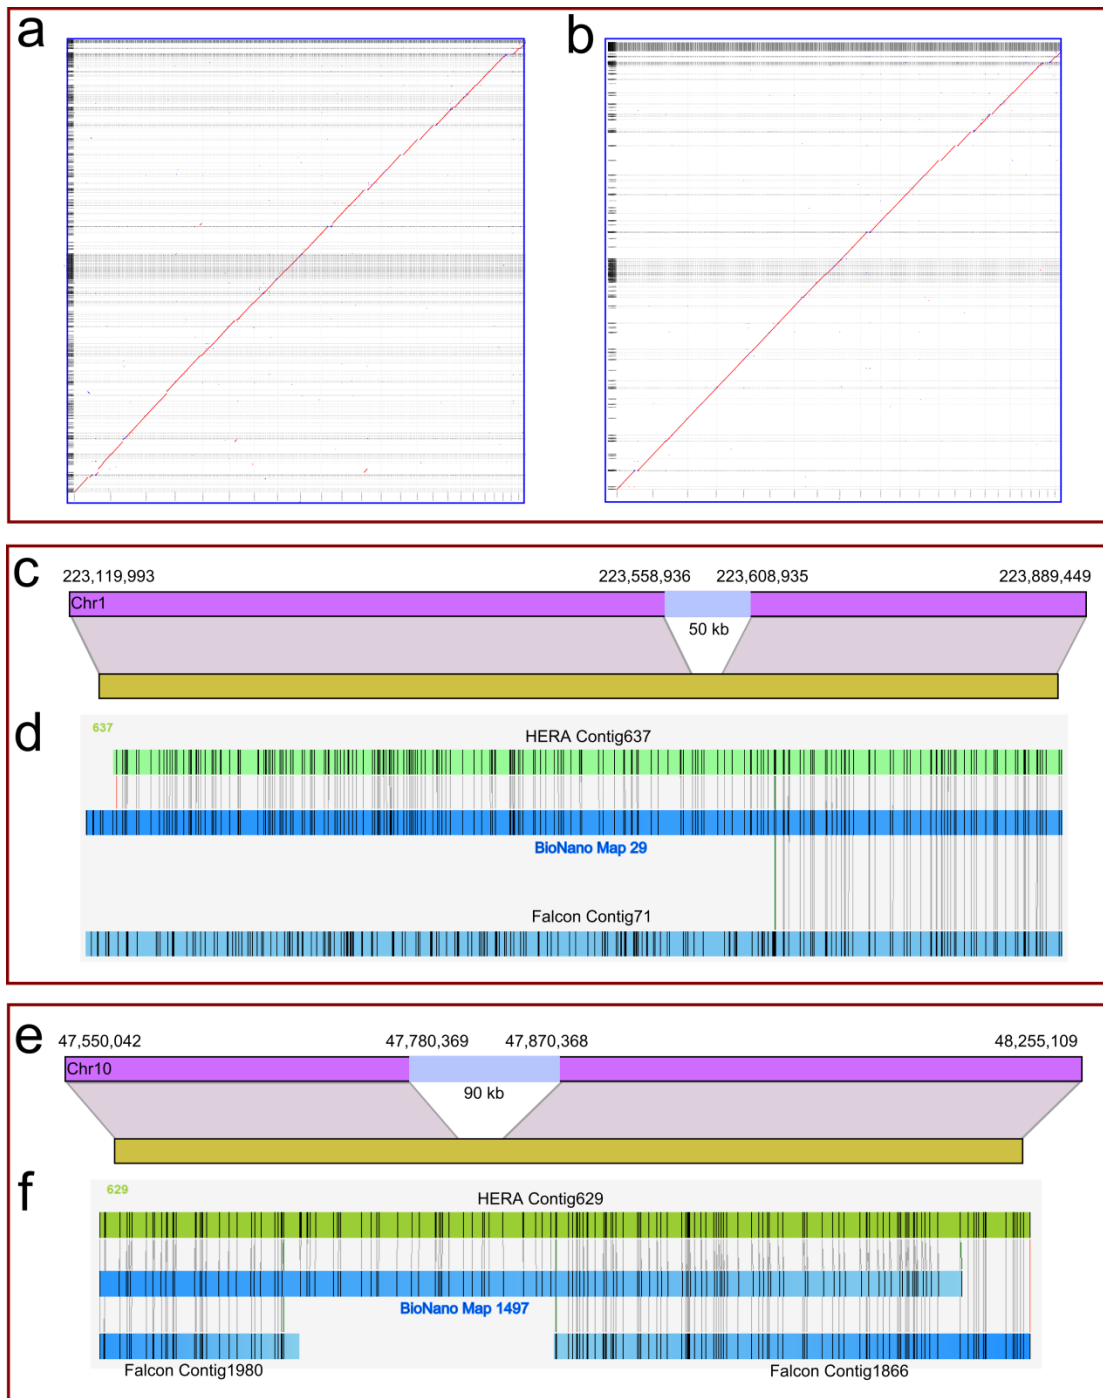

**Supplementary Figure 8: Examples of potential gap closing in GRCh38 reference genome by HERA.**

(a) The alignment of HX1\_FALCON to GRCh38. (b) The alignment of HX1\_HERA1 to GRCh38. (c)(d) A gap on GRCh38 chromosome 1 could be closed based on sequence of HX1\_HERA1. HERA correctly assembled a whole region that has a missing sequence in HX1\_FALCON. The gap in GRCh38 is within the missing sequence of HX1\_FALCON. (e)(f) Another gap on GRCh38 chromosome 10 could be closed using the sequence in HX1\_HERA1. HERA correctly assembled the region that contained two contigs and a missing sequence in HX1\_Falcon. The gap on GRCh38 chromosome 10 is within the missing sequence of HX1\_FALCON.

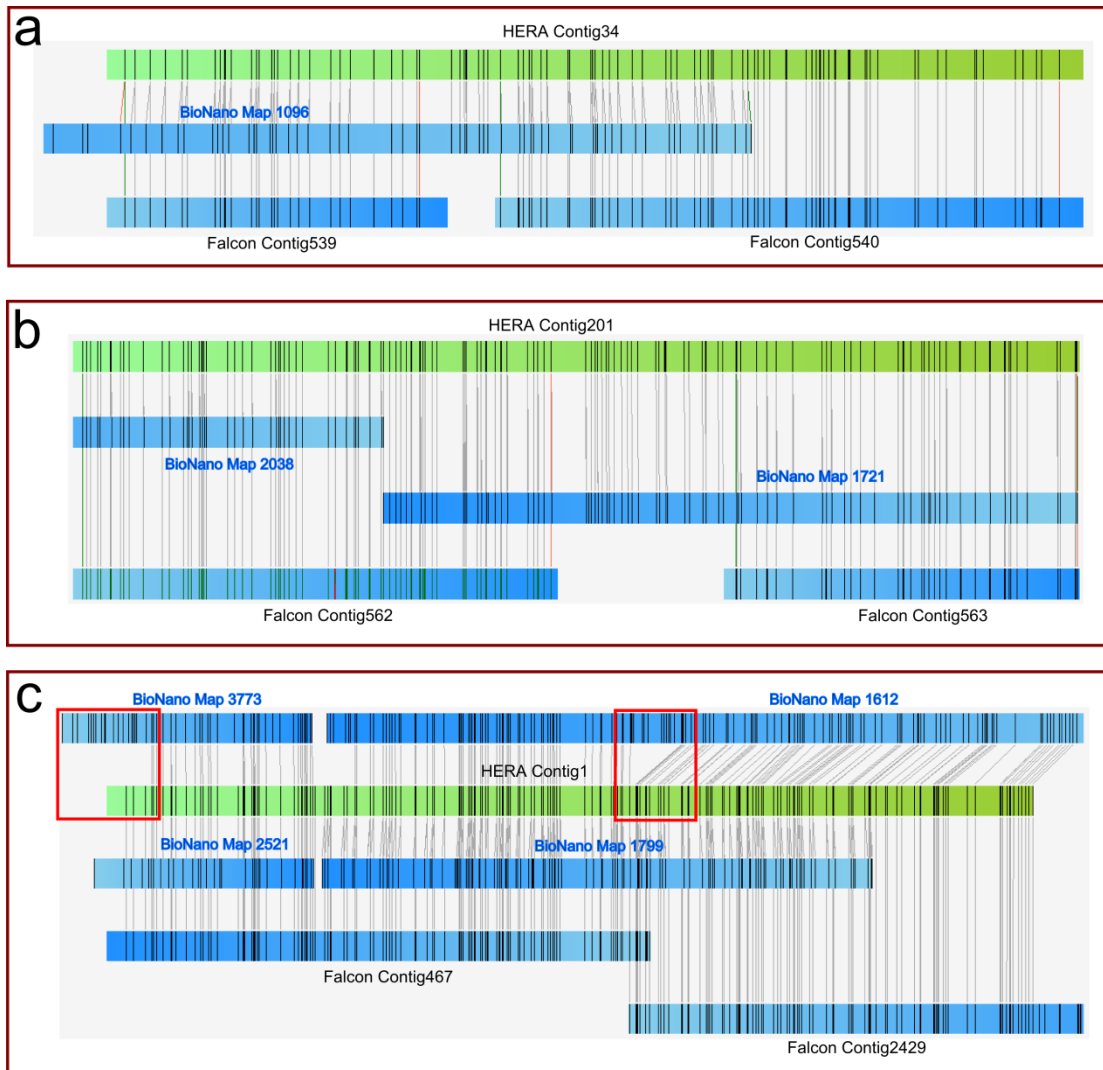

**Supplementary Figure 9: The examples of potential falsely anchored sequences in either chromosome X or chromosome Y in GRCh38.**

The HERA contigs Contig34, Contig201 and Contig1 were each partially aligned to GRCh38 chromosomes X and Y with some segments matching to only one chromosome and some other segments matching to both chromosomes (Supplementary Table 5). **(a)(b)** A single group of BioNano map completely covered the HERA contigs in each case which proved their correctness. **(c)** A single HERA contig Contig1 matched to two groups of BioNano maps. One map is consistent with Contig1 while the other one contained indels and overhangs compared with Contig1, suggesting that the corresponding sequences in GRCh38 chromosomes X and Y were misassembled or mispositioned.

## Supplementary Tables

**Supplementary Table 1: Summary of raw and corrected PacBio data**

| Genome        | Type      | Read num | N50 (bp) | Average (bp) | Total (Gb) | Depth of Coverage (x) |
|---------------|-----------|----------|----------|--------------|------------|-----------------------|
| <b>R498</b>   | Raw       | 6085344  | 11201    | 7766         | 47         | 118                   |
|               | Corrected | 2013831  | 8424     | 8666         | 17         | 43                    |
| <b>B73</b>    | Raw       | 13698313 | 16699    | 12206        | 81         | 76                    |
|               | Corrected | 5304672  | 32775    | 15358        | 167        | 37                    |
| <b>HX1</b>    | Raw       | 44207919 | 12134    | 6990         | 309        | 103                   |
|               | Corrected | 9972749  | 12911    | 11912        | 118        | 39                    |
| <b>Pinku1</b> | Raw       | 5249615  | 10083    | 6941         | 36         | 80                    |
|               | Corrected | 2353782  | 9369     | 6946         | 16         | 35                    |

The R498 SMRT reads were self-corrected by PBcR with default parameters. The SMRT reads of B73, HX1 and Pinku1 were self-corrected by CANU with default parameters.

**Supplementary Table 2: Summary of hybrid scaffolds with BioNano maps.**

| Genome        | Method         | Num | N50 (Mb) | Max len (Mb) | Total len (Mb) | Gap num | Gap len (Mb) |
|---------------|----------------|-----|----------|--------------|----------------|---------|--------------|
| <b>R498</b>   | BioNano+CANU   | 105 | 5.67     | 18.25        | 388.9          | 334     | 5.91         |
|               | BioNano+HERA   | 32  | 17.51    | 32.2         | 390.2          | 28      | 1.16         |
| <b>B73</b>    | BioNano+PBcR   | 319 | 10.2     | 45.88        | 2060.3         | 2002    | 43.07        |
|               | BioNano+HERA   | 68  | 107.5    | 194.6        | 2110           | 18      | 0.98         |
| <b>HX1</b>    | BioNano+FALCON | 325 | 24.05    | 83.66        | 2724.4         | 476     | 39.37        |
| <b>Pinku1</b> | BioNano+PBcR   | 550 | 5.43     | 15.04        | 451.9          | 781     | 13.29        |
|               | BioNano+HERA   | 22  | 51.77    | 61.99        | 453.7          | 8       | 0.49         |

Note that each genome included unfiltered contaminated sequences.

**Supplementary Table 3: Summary of sequence alignment of rice BACs to HERA assembled regions and CANU assembled regions.**

| GenBank ID        | BAC Clone     | Length (bp) | HERA Sequence Identity (%) | HERA Sequence Len (bp) | CANU Sequence Identity (%) | CANU Sequence Len (bp) | BioNano Map Support |
|-------------------|---------------|-------------|----------------------------|------------------------|----------------------------|------------------------|---------------------|
| <b>AL731599.2</b> | OSJNBa0053B21 | 151,936     | 99.43                      | 51,330                 | 99.30                      | 100,606                | Yes                 |
| <b>AL606690.3</b> | OSJNBa0060D06 | 151,506     | 99.41                      | 71,907                 | 99.37                      | 79,599                 | Yes                 |
| <b>AL731594.5</b> | OSJNBa0032N05 | 159,486     | 99.28                      | 89,879                 | 99.47                      | 69,607                 | Yes                 |
| <b>AL662972.3</b> | OSJNBa0063G07 | 157,622     | 99.65                      | 56,640                 | 99.67                      | 100,640                | Yes                 |
| <b>AP003372.2</b> | OJ1014_G12    | 158,830     | 99.63                      | 53,308                 | 99.61                      | 105,522                | Yes                 |
| <b>AL731601.3</b> | OSJNBa0044M19 | 188,317     | 99.27                      | 49,356                 | 99.19                      | 138,961                | Yes                 |
| <b>AL663022.4</b> | OSJNBa0054D14 | 160,587     | 99.83                      | 65,769                 | 99.76                      | 94,818                 | Yes                 |
| <b>AL662958.3</b> | OSJNBa0019D11 | 163,039     | 99.37                      | 43,740                 | 99.38                      | 119,299                | Yes                 |

**Supplementary Table 4: The comparison of HERA constructed B73 genome and B73 RefGen\_v4 reference genome**

| Chr          | Chr_len*<br>(B73_HERA1) | Chr_len*<br>(RefGen_v4) | Gap_num<br>(B73_HER<br>A1) | Gap_num<br>(RefGen_v<br>4) | Gap_len**<br>(B73_HER<br>A1) | Gap_len**<br>(RefGen_v<br>4) | Gene_num<br>(B73_HER<br>A1) | Gene_num<br>(RefGen_v<br>4) |
|--------------|-------------------------|-------------------------|----------------------------|----------------------------|------------------------------|------------------------------|-----------------------------|-----------------------------|
| Chr1         | 308,056,010             | 303,355,124             | 15                         | 348                        | 158,216                      | 3,686,593                    | 7,009                       | 6,948                       |
| Chr2         | 242,550,780             | 240,531,092             | 7                          | 292                        | 6,135                        | 3,911,184                    | 5,817                       | 5,780                       |
| Chr3         | 236,649,599             | 233,293,116             | 6                          | 276                        | 51,686                       | 2,374,718                    | 5,000                       | 4,945                       |
| Chr4         | 247,697,134             | 242,944,880             | 11                         | 276                        | 457,490                      | 4,049,725                    | 5,167                       | 5,118                       |
| Chr5         | 223,598,723             | 220,830,651             | 10                         | 281                        | 197,463                      | 3,071,589                    | 5,467                       | 5,293                       |
| Chr6         | 173,718,017             | 169,277,604             | 10                         | 195                        | 93,249                       | 4,755,566                    | 4,138                       | 4,049                       |
| Chr7         | 178,308,893             | 180,151,203             | 5                          | 238                        | 1,299                        | 2,230,339                    | 3,781                       | 3,762                       |
| Chr8         | 180,052,061             | 178,721,167             | 6                          | 230                        | 1,200                        | 2,401,470                    | 4,499                       | 4,263                       |
| Chr9         | 160,890,507             | 157,329,761             | 2                          | 213                        | 400                          | 2,440,021                    | 3,650                       | 3,590                       |
| Chr10        | 152,387,480             | 149,170,640             | 4                          | 174                        | 22,811                       | 1,811,674                    | 3,288                       | 3,253                       |
| <b>Total</b> | <b>2,103,909,204</b>    | <b>2,075,605,238</b>    | <b>76</b>                  | <b>2,523</b>               | <b>989,949</b>               | <b>30,732,879</b>            | <b>47,816</b>               | <b>47,001</b>               |

\*The total length of the contigs, not including the length of the gaps. \*\*The gap length indicates the Ns on each chromosome, including known and unknown length of gaps, so the real length is unknown.

**Supplementary Table 5: Summary of the potential indels in the HERA assembled B73 genome identified by comparison with BioNano genome maps**

| Chr ID | Start       | End         | Genome Map ID | Start      | End        | Len Diff (bp) | T | S |
|--------|-------------|-------------|---------------|------------|------------|---------------|---|---|
| 1      | 4,551,618   | 4,583,619   | 220           | 1,773,106  | 1,782,926  | 22,181        | D | P |
| 1      | 21,627,254  | 21,631,714  | 166           | 3,167,754  | 3,151,181  | 12,112        | I | P |
| 1      | 24,612,728  | 24,646,932  | 166           | 177,045    | 169,720    | 26,880        | D | P |
| 1      | 25,812,888  | 25,836,266  | 750           | 255,228    | 250,242    | 18,393        | D | P |
| 1      | 51,137,480  | 51,139,100  | 2,511         | 844,509    | 878,954    | 32,825        | I | P |
| 1      | 56,807,880  | 56,831,828  | 1,987         | 1,475,687  | 1,480,927  | 18,708        | D | P |
| 1      | 62,335,496  | 62,360,336  | 1,034         | 5,294,871  | 5,293,142  | 23,111        | D | P |
| 1      | 93,187,936  | 93,210,640  | 429           | 1,412,803  | 1,408,391  | 18,292        | D | P |
| 1      | 104,527,680 | 104,542,784 | 251           | 2,734,151  | 2,729,686  | 10,640        | D | P |
| 1      | 119,389,288 | 119,405,216 | 164           | 337,893    | 343,751    | 10,070        | D | P |
| 1      | 138,412,576 | 138,450,912 | 3             | 11,377,289 | 11,203,336 | 135,616       | I | P |
| 1      | 139,730,288 | 139,731,920 | 3             | 9,928,532  | 9,914,203  | 12,696        | I | P |
| 1      | 156,598,608 | 156,627,744 | 1,723         | 126,192    | 142,466    | 12,863        | D | P |
| 1      | 193,006,832 | 193,007,432 | 565           | 1,019,188  | 986,209    | 32,378        | I | P |
| 1      | 210,659,328 | 210,662,320 | 823           | 803,724    | 817,539    | 10,823        | I | P |
| 1      | 220,322,912 | 220,327,280 | 229           | 3,996,593  | 3,982,071  | 10,153        | I | P |
| 1      | 240,802,928 | 240,832,896 | 331           | 1,730,312  | 1,717,058  | 16,714        | D | P |
| 1      | 252,363,456 | 252,363,920 | 107           | 2,705,339  | 2,598,686  | 106,188       | I | P |

|   |             |             |       |           |           |         |   |   |
|---|-------------|-------------|-------|-----------|-----------|---------|---|---|
| 1 | 252,594,048 | 252,743,504 | 107   | 2,368,525 | 2,345,568 | 126,499 | D | P |
| 1 | 41,562,720  | 41,563,328  | 411   | 1,603,771 | 1,614,576 | 10,196  | I | H |
| 1 | 138,157,472 | 138,223,248 | 382   | 2,178,795 | 2,317,594 | 73,023  | I | H |
| 1 | 171,121,920 | 171,144,800 | 4     | 5,743,210 | 5,709,924 | 10,405  | I | H |
| 1 | 228,309,440 | 228,312,176 | 526   | 703,060   | 785,239   | 79,443  | I | H |
| 1 | 289,428,176 | 289,430,656 | 1,887 | 1,011,956 | 956,126   | 53,350  | I | H |
| 1 | 300,947,760 | 300,964,384 | 182   | 1,685,001 | 1,727,084 | 25,459  | I | H |
| 1 | 301,014,224 | 301,056,368 | 182   | 1,776,674 | 1,793,305 | 25,514  | D | H |
| 2 | 80,015,080  | 80,037,328  | 2,018 | 766,315   | 763,668   | 19,601  | D | P |
| 2 | 115,079,080 | 115,081,864 | 539   | 547,781   | 589,300   | 38,735  | I | P |
| 2 | 118,257,728 | 118,283,536 | 3,766 | 77,400    | 65,562    | 13,970  | D | P |
| 2 | 121,507,128 | 121,527,920 | 540   | 1,119,071 | 1,110,016 | 11,737  | D | P |
| 2 | 162,410,144 | 162,442,496 | 385   | 955,771   | 946,138   | 22,720  | D | P |
| 2 | 165,856,768 | 165,901,504 | 3,689 | 1,021,076 | 1,046,247 | 19,565  | D | P |
| 2 | 171,579,360 | 171,606,688 | 632   | 741,265   | 734,099   | 20,163  | D | P |
| 2 | 174,924,608 | 174,965,264 | 2,081 | 838,106   | 834,500   | 37,050  | D | P |
| 2 | 178,477,664 | 178,478,368 | 1,238 | 2,278,098 | 2,257,099 | 20,295  | I | P |
| 2 | 203,955,328 | 203,990,784 | 547   | 165,508   | 159,071   | 29,019  | D | P |
| 2 | 215,171,360 | 215,193,184 | 1,833 | 1,484,862 | 1,482,038 | 19,000  | D | P |
| 2 | 215,240,032 | 215,242,896 | 1,833 | 1,434,920 | 1,421,056 | 11,000  | I | P |
| 2 | 75,289,872  | 75,312,208  | 507   | 62,335    | 95,328    | 10,656  | I | H |
| 2 | 96,765,560  | 96,790,704  | 105   | 802,142   | 414,768   | 362,230 | I | H |
| 2 | 151,660,256 | 151,665,200 | 1,852 | 1,069,616 | 1,085,124 | 10,563  | I | H |
| 2 | 217,557,552 | 217,565,856 | 566   | 1,145,287 | 1,126,764 | 10,219  | I | H |
| 2 | 232,741,080 | 232,760,960 | 459   | 1,927,116 | 1,921,680 | 14,445  | D | H |
| 3 | 3,380,351   | 3,386,144   | 172   | 363,486   | 391,809   | 22,530  | I | P |
| 3 | 3,977,446   | 4,008,238   | 515   | 1,542,193 | 1,535,613 | 24,213  | D | P |
| 3 | 27,530,224  | 27,530,692  | 110   | 773,158   | 759,412   | 13,277  | I | P |
| 3 | 75,733,656  | 75,740,384  | 1,884 | 1,460,066 | 1,488,359 | 21,565  | I | P |
| 3 | 87,992,800  | 88,008,048  | 5     | 6,960,711 | 6,865,271 | 80,192  | I | P |
| 3 | 105,506,856 | 105,513,984 | 145   | 1,475,777 | 1,458,055 | 10,593  | I | P |
| 3 | 128,586,280 | 128,611,656 | 1,601 | 2,083,991 | 2,076,791 | 18,177  | D | P |
| 3 | 144,510,320 | 144,530,368 | 241   | 2,644,468 | 2,652,100 | 12,416  | D | P |
| 3 | 150,990,464 | 151,009,600 | 198   | 836,144   | 831,175   | 14,168  | D | P |
| 3 | 163,183,568 | 163,185,296 | 9     | 6,820,180 | 6,796,128 | 22,323  | I | P |
| 3 | 164,899,120 | 164,904,704 | 9     | 5,083,559 | 5,067,322 | 10,653  | I | P |
| 3 | 166,566,416 | 166,571,040 | 9     | 3,406,828 | 3,391,543 | 10,660  | I | P |
| 3 | 166,605,776 | 166,625,520 | 9     | 3,357,138 | 3,347,476 | 10,083  | D | P |
| 3 | 166,712,560 | 166,719,152 | 9     | 3,260,023 | 3,229,787 | 23,644  | I | P |
| 3 | 173,180,576 | 173,203,280 | 260   | 3,140,324 | 3,145,029 | 18,000  | D | P |
| 3 | 195,414,128 | 195,445,216 | 70    | 2,761,641 | 2,756,026 | 25,473  | D | P |
| 3 | 226,633,904 | 226,647,936 | 80    | 1,350,763 | 1,317,457 | 19,274  | I | P |
| 3 | 44,842,672  | 44,853,056  | 24    | 3,306,079 | 3,272,171 | 23,524  | I | H |
| 3 | 47,012,008  | 47,186,684  | 24    | 1,078,940 | 1,073,603 | 169,340 | D | H |



|   |             |             |       |           |           |         |   |   |
|---|-------------|-------------|-------|-----------|-----------|---------|---|---|
| 3 | 98,998,704  | 98,999,304  | 190   | 1,341,124 | 1,351,769 | 10,045  | I | H |
| 3 | 193,276,016 | 193,276,528 | 2,136 | 742,063   | 722,278   | 19,273  | I | H |
| 4 | 1,854,630   | 1,857,412   | 69    | 2,683,689 | 2,667,071 | 13,835  | I | P |
| 4 | 1,880,434   | 1,906,492   | 69    | 2,643,986 | 2,631,738 | 13,809  | D | P |
| 4 | 2,167,096   | 2,172,263   | 69    | 2,383,383 | 2,289,294 | 88,922  | I | P |
| 4 | 2,176,326   | 2,180,783   | 69    | 2,284,903 | 2,162,138 | 118,308 | I | P |
| 4 | 3,678,850   | 3,679,810   | 69    | 672,211   | 497,768   | 173,483 | I | P |
| 4 | 4,852,205   | 4,854,760   | 1,249 | 654,041   | 717,791   | 61,194  | I | P |
| 4 | 63,852,460  | 63,854,028  | 265   | 322,095   | 405,966   | 82,303  | I | P |
| 4 | 72,974,656  | 72,999,632  | 124   | 555,341   | 550,141   | 19,777  | D | P |
| 4 | 78,581,704  | 78,602,320  | 257   | 206,748   | 212,517   | 14,848  | D | P |
| 4 | 131,888,392 | 131,895,392 | 319   | 1,211,161 | 1,239,535 | 21,374  | I | P |
| 4 | 163,438,512 | 163,477,056 | 3,785 | 2,658,465 | 2,641,106 | 21,185  | D | P |
| 4 | 169,117,712 | 169,120,992 | 55    | 1,631,353 | 1,756,230 | 121,597 | I | P |
| 4 | 182,853,536 | 182,884,016 | 27    | 4,782,374 | 4,779,095 | 27,202  | D | P |
| 4 | 183,884,336 | 183,885,120 | 27    | 3,783,655 | 3,761,355 | 21,516  | I | P |
| 4 | 184,491,936 | 184,517,344 | 27    | 3,153,613 | 3,140,001 | 11,797  | D | P |
| 4 | 77,660,416  | 77,661,056  | 597   | 788,279   | 712,517   | 75,121  | I | H |
| 4 | 89,165,984  | 89,190,736  | 622   | 4,370,581 | 4,335,326 | 10,502  | I | H |
| 4 | 107,775,568 | 107,777,352 | 591   | 2,578,609 | 2,534,498 | 42,326  | I | H |
| 4 | 108,233,520 | 108,330,112 | 591   | 2,084,649 | 1,961,646 | 26,411  | I | H |
| 4 | 192,258,336 | 192,261,408 | 355   | 798,243   | 824,332   | 23,016  | I | H |
| 5 | 25,237,346  | 25,253,550  | 131   | 3,057,566 | 3,054,006 | 12,645  | D | P |
| 5 | 43,779,696  | 43,808,892  | 202   | 896,092   | 898,790   | 26,498  | D | P |
| 5 | 68,062,976  | 68,067,472  | 289   | 428,482   | 550,603   | 117,624 | I | P |
| 5 | 71,643,856  | 71,654,600  | 2,468 | 348,209   | 314,223   | 23,241  | I | P |
| 5 | 79,141,352  | 79,210,400  | 12    | 3,109,193 | 3,143,777 | 34,464  | D | P |
| 5 | 105,676,600 | 105,697,496 | 812   | 37,258    | 88,631    | 30,477  | I | P |
| 5 | 115,897,520 | 115,921,344 | 204   | 2,314,844 | 2,311,563 | 20,543  | D | P |
| 5 | 116,575,032 | 116,594,712 | 204   | 1,659,122 | 1,628,644 | 10,797  | I | P |
| 5 | 124,591,816 | 124,593,544 | 222   | 2,588,328 | 2,689,645 | 99,588  | I | P |
| 5 | 124,596,936 | 124,597,568 | 222   | 2,693,160 | 2,792,134 | 98,341  | I | P |
| 5 | 124,619,472 | 124,621,264 | 222   | 2,813,962 | 2,924,990 | 109,236 | I | P |
| 5 | 154,451,984 | 154,482,144 | 2,593 | 383,267   | 373,410   | 20,303  | D | P |
| 5 | 168,284,720 | 168,309,280 | 1,841 | 148,005   | 153,778   | 18,788  | D | P |
| 5 | 212,519,472 | 212,540,832 | 21    | 3,728,278 | 3,725,938 | 19,021  | D | P |
| 5 | 212,559,024 | 212,582,384 | 21    | 3,708,147 | 3,616,755 | 68,031  | I | P |
| 5 | 212,680,800 | 212,740,352 | 21    | 3,517,947 | 3,439,702 | 18,693  | I | P |
| 5 | 215,348,960 | 215,516,336 | 21    | 833,382   | 822,781   | 156,775 | D | P |
| 5 | 215,516,336 | 215,578,256 | 21    | 822,781   | 820,340   | 59,479  | D | P |
| 5 | 11,658,413  | 11,673,350  | 297   | 1,212,306 | 1,251,576 | 24,333  | I | H |
| 5 | 195,065,600 | 195,066,112 | 536   | 663,428   | 675,297   | 11,356  | I | H |
| 5 | 203,274,832 | 203,283,904 | 1,108 | 227,000   | 207,083   | 10,845  | I | H |
| 6 | 11,655,017  | 11,664,047  | 157   | 3,378,070 | 3,474,455 | 87,355  | I | P |

|   |             |             |       |           |           |         |   |   |
|---|-------------|-------------|-------|-----------|-----------|---------|---|---|
| 6 | 11,808,197  | 11,960,196  | 157   | 3,845,183 | 3,953,565 | 43,618  | D | P |
| 6 | 12,419,332  | 12,582,017  | 157   | 4,275,583 | 4,486,129 | 47,861  | I | P |
| 6 | 12,594,371  | 12,710,119  | 157   | 4,498,076 | 4,710,764 | 96,939  | I | P |
| 6 | 12,807,213  | 12,852,586  | 157   | 4,809,283 | 4,906,676 | 52,020  | I | P |
| 6 | 82,638,008  | 82,658,352  | 781   | 1,034,455 | 1,002,957 | 11,154  | I | P |
| 6 | 91,890,080  | 91,919,904  | 2,517 | 486,089   | 492,269   | 23,645  | D | P |
| 6 | 102,223,040 | 102,334,112 | 549   | 1,072,124 | 1,012,854 | 51,802  | D | P |
| 6 | 102,410,080 | 102,422,424 | 549   | 937,203   | 820,892   | 103,967 | I | P |
| 6 | 102,498,584 | 102,504,280 | 549   | 744,528   | 659,940   | 78,892  | I | P |
| 6 | 119,670,536 | 119,675,088 | 16    | 5,137,337 | 5,197,908 | 56,019  | I | P |
| 6 | 131,105,208 | 131,120,336 | 191   | 2,250,796 | 2,253,303 | 12,621  | D | P |
| 6 | 158,316,032 | 158,327,056 | 1,120 | 143,336   | 120,716   | 11,595  | I | P |
| 6 | 25,069,964  | 25,113,676  | 1,321 | 136,039   | 351,780   | 172,029 | I | H |
| 6 | 78,605,848  | 78,609,704  | 5,841 | 159,753   | 232,959   | 69,349  | I | H |
| 6 | 90,939,000  | 90,942,816  | 1,113 | 66,909    | 165,515   | 94,789  | I | H |
| 6 | 138,975,360 | 138,976,960 | 23    | 1,765,129 | 1,782,658 | 15,929  | I | H |
| 6 | 144,021,424 | 144,026,192 | 519   | 1,183,658 | 1,168,815 | 10,074  | I | H |
| 6 | 145,947,072 | 145,961,856 | 3,609 | 749,908   | 775,505   | 10,812  | I | H |
| 7 | 50,087,012  | 50,113,532  | 465   | 524,626   | 526,794   | 24,353  | D | P |
| 7 | 91,966,704  | 91,973,616  | 30    | 1,620,466 | 1,747,711 | 120,333 | I | P |
| 7 | 91,975,896  | 91,976,488  | 30    | 1,749,893 | 1,907,576 | 157,090 | I | P |
| 7 | 117,633,816 | 117,659,008 | 1,096 | 1,182,418 | 1,187,392 | 20,219  | D | P |
| 7 | 118,997,800 | 118,998,344 | 1,096 | 2,524,095 | 2,658,204 | 133,564 | I | P |
| 7 | 118,998,344 | 119,008,712 | 1,096 | 2,658,204 | 2,761,083 | 92,511  | I | P |
| 7 | 134,448,192 | 134,481,360 | 112   | 261,698   | 266,819   | 28,048  | D | P |
| 7 | 40,952,836  | 40,957,768  | 914   | 278,159   | 293,534   | 10,442  | I | H |
| 7 | 53,857,840  | 53,863,560  | 605   | 665,559   | 638,953   | 20,885  | I | H |
| 7 | 58,093,084  | 58,094,880  | 31    | 1,870,637 | 2,105,208 | 232,775 | I | H |
| 7 | 153,846,240 | 153,906,896 | 593   | 1,495,884 | 1,449,869 | 14,642  | D | H |
| 7 | 170,307,392 | 170,310,640 | 78    | 1,244,441 | 1,294,574 | 46,884  | I | H |
| 8 | 8,013,767   | 8,029,805   | 113   | 3,831,026 | 3,833,259 | 13,806  | D | P |
| 8 | 13,753,276  | 13,775,711  | 1,436 | 1,777,472 | 1,786,409 | 13,499  | D | P |
| 8 | 31,443,820  | 31,485,556  | 375   | 512,048   | 526,765   | 27,019  | D | P |
| 8 | 39,075,256  | 39,131,980  | 14    | 4,545,850 | 4,561,073 | 41,502  | D | P |
| 8 | 78,990,224  | 79,031,080  | 40    | 2,078,496 | 2,109,093 | 10,259  | D | P |
| 8 | 119,585,184 | 119,596,248 | 139   | 2,133,217 | 2,110,471 | 11,681  | I | P |
| 8 | 121,115,224 | 121,138,704 | 139   | 594,208   | 592,396   | 21,669  | D | P |
| 8 | 144,940,496 | 144,954,448 | 1,070 | 202,738   | 205,706   | 10,985  | D | P |
| 8 | 151,482,624 | 151,507,976 | 3,595 | 1,690,831 | 1,682,697 | 17,219  | D | P |
| 8 | 161,398,224 | 161,415,648 | 1,989 | 1,706,424 | 1,751,898 | 28,049  | I | P |
| 8 | 9,006,658   | 9,010,353   | 281   | 940,623   | 957,455   | 13,137  | I | H |
| 8 | 48,852,668  | 48,887,288  | 2,701 | 386,666   | 76,662    | 275,384 | I | H |
| 8 | 80,450,664  | 80,454,464  | 456   | 1,105,823 | 1,091,173 | 10,850  | I | H |
| 8 | 81,370,656  | 81,371,264  | 456   | 181,671   | 106,727   | 74,335  | I | H |

|    |             |             |       |           |           |         |   |   |
|----|-------------|-------------|-------|-----------|-----------|---------|---|---|
| 8  | 99,272,728  | 99,273,424  | 2,348 | 296,671   | 307,479   | 10,111  | I | H |
| 8  | 123,695,512 | 123,697,472 | 1,662 | 2,784,927 | 2,740,717 | 42,249  | I | H |
| 9  | 11,251,617  | 11,285,410  | 684   | 266,574   | 262,445   | 29,664  | D | P |
| 9  | 16,744,848  | 16,746,469  | 755   | 757,792   | 730,936   | 25,234  | I | P |
| 9  | 28,676,688  | 28,681,580  | 160   | 1,457,341 | 1,509,112 | 46,879  | I | P |
| 9  | 36,252,288  | 36,283,340  | 1,567 | 4,217,106 | 4,212,000 | 25,947  | D | P |
| 9  | 61,730,944  | 61,734,020  | 200   | 2,808,688 | 2,732,349 | 73,263  | I | P |
| 9  | 62,066,764  | 62,067,252  | 200   | 2,400,298 | 2,363,443 | 36,367  | I | P |
| 9  | 65,387,348  | 65,432,912  | 2,623 | 490,378   | 510,689   | 25,253  | D | P |
| 9  | 74,886,064  | 74,889,224  | 336   | 1,239,754 | 1,164,654 | 71,939  | I | P |
| 9  | 75,011,464  | 75,027,944  | 336   | 1,042,536 | 946,069   | 79,987  | I | P |
| 9  | 75,033,032  | 75,087,832  | 336   | 940,778   | 859,604   | 26,374  | I | P |
| 9  | 75,448,512  | 75,508,456  | 336   | 506,186   | 431,465   | 14,776  | I | P |
| 9  | 129,592,212 | 129,594,832 | 132   | 1,740,084 | 1,697,680 | 39,783  | I | P |
| 9  | 130,020,520 | 130,038,248 | 132   | 1,272,396 | 1,190,430 | 64,238  | I | P |
| 9  | 135,718,400 | 135,734,016 | 63    | 3,413,853 | 3,387,642 | 10,595  | I | P |
| 9  | 136,130,080 | 136,140,864 | 63    | 2,991,265 | 2,969,798 | 10,683  | I | P |
| 9  | 151,009,920 | 151,017,088 | 8     | 5,497,197 | 5,536,397 | 32,032  | I | P |
| 9  | 46,279,352  | 46,282,512  | 441   | 1,260,914 | 1,156,385 | 101,369 | I | H |
| 9  | 58,256,360  | 58,256,968  | 858   | 400,081   | 244,912   | 154,561 | I | H |
| 10 | 608,982     | 634,423     | 444   | 831,218   | 822,535   | 16,759  | D | P |
| 10 | 4,573,274   | 4,574,790   | 57    | 3,101,099 | 3,124,600 | 21,985  | I | P |
| 10 | 5,247,608   | 5,268,361   | 57    | 3,798,266 | 3,807,023 | 11,996  | D | P |
| 10 | 6,961,628   | 6,962,966   | 133   | 2,555,972 | 2,511,536 | 43,097  | I | P |
| 10 | 9,093,998   | 9,121,761   | 133   | 382,448   | 380,310   | 25,625  | D | P |
| 10 | 38,141,936  | 38,177,644  | 294   | 1,223,445 | 1,209,517 | 21,781  | D | P |
| 10 | 55,834,056  | 55,859,336  | 208   | 2,228,581 | 2,233,614 | 20,247  | D | P |
| 10 | 93,578,528  | 93,603,784  | 879   | 424,821   | 433,472   | 16,605  | D | P |
| 10 | 106,456,608 | 106,460,392 | 851   | 486,445   | 533,904   | 43,675  | I | P |
| 10 | 116,794,288 | 116,817,752 | 323   | 1,461,361 | 1,473,163 | 11,662  | D | P |
| 10 | 119,931,664 | 119,937,816 | 2,503 | 711,432   | 790,697   | 73,113  | I | P |
| 10 | 136,809,600 | 136,812,784 | 625   | 1,159,427 | 1,196,129 | 33,517  | I | P |
| 10 | 137,615,216 | 137,651,472 | 1,456 | 426,281   | 437,216   | 25,322  | D | P |
| 10 | 27,041,284  | 27,098,164  | 76    | 1,468,306 | 1,599,235 | 74,048  | I | H |
| 10 | 49,514,504  | 49,543,636  | 154   | 2,800,658 | 2,741,790 | 29,736  | I | H |
| 10 | 58,877,600  | 58,878,100  | 2,291 | 1,459,724 | 1,448,138 | 11,085  | I | H |
| 10 | 94,431,568  | 94,448,688  | 1,940 | 315,801   | 343,547   | 10,625  | I | H |

Abbreviations: T, variation type; I, insertion; D, deletion; S, software; P, PBcR; H, HERA.

**Supplementary Table 6: The alignment of HERA constructed HX1 contigs to GRCh38 chromosomes X and Y**

| Query     | Query Start | Query End | Chr | Ref ID       | Ref Start (bp) | Ref End (bp) | Identity (%) |
|-----------|-------------|-----------|-----|--------------|----------------|--------------|--------------|
| Contig1   | 0           | 83,694    | X   | NC_000023.11 | 64,927,911     | 65,011,805   | 99.48        |
|           | 83,835      | 651,343   | Y   | NC_000024.10 | 52,624,446     | 53,194,126   | 98.54        |
|           | 652,064     | 922,298   | X   | NC_000023.11 | 65,583,723     | 65,855,205   | 98.76        |
|           | 833,077     | 1,461,238 | Y   | NC_000024.10 | 53,383,205     | 54,016,181   | 98.19        |
|           | 1,382,224   | 1,675,903 | X   | NC_000023.11 | 66,406,295     | 66,701,315   | 98.72        |
|           | 1,675,899   | 1,798,927 | X   | NC_000023.11 | 66,685,587     | 66,809,174   | 98.91        |
| Contig34  | 40,275      | 192,785   | X   | NC_000023.11 | 1,764,535      | 1,919,981    | 97.17        |
|           | 40,275      | 192,785   | Y   | NC_000024.10 | 1,764,535      | 1,919,981    | 97.17        |
|           | 220,908     | 364,992   | Y   | NC_000024.10 | 2,133,035      | 2,277,067    | 98.53        |
|           | 220,908     | 364,791   | X   | NC_000023.11 | 2,133,035      | 2,276,863    | 98.53        |
|           | 366,326     | 463,514   | Y   | NC_000024.10 | 2,282,303      | 2,374,747    | 93.42        |
|           | 463,226     | 1,025,152 | X   | NC_000023.11 | 2,376,715      | 2,939,095    | 99.15        |
| Contig201 | 0           | 503,301   | X   | NC_000023.11 | 154,800,564    | 155,304,571  | 99.63        |
|           | 535,355     | 703,527   | X   | NC_000023.11 | 155,336,693    | 155,504,551  | 98.92        |
|           | 653,061     | 999,112   | X   | NC_000023.11 | 155,453,983    | 155,803,824  | 98.53        |
|           | 1,001,253   | 1,219,112 | X   | NC_000023.11 | 155,803,260    | 156,021,579  | 99.45        |
|           | 1,001,253   | 1,219,112 | Y   | NC_000024.10 | 56,989,780     | 57,208,099   | 99.45        |

**Supplementary Table 7: Summary of comparing the HERA assembled HX1 regions to other human genomes.**

| Genome Name       | GenBank Accession  | Contig N50 (bp)   | Genome size (bp)     | Flanking Sequence Identity (%) | HERA Sequence Covered (%) | HERA Sequence Identity (%) | HERA Sequence Covered Num |
|-------------------|--------------------|-------------------|----------------------|--------------------------------|---------------------------|----------------------------|---------------------------|
| <b>GRCh38.p13</b> | PRJNA31257         | 57,879,411        | 3,099,706,404        | 99.08                          | 85.89                     | 99.12                      | 826                       |
| <b>CHM1</b>       | PRJNA246220        | 34,007,701        | 2,989,427,264        | 99.18                          | 83.55                     | 99.14                      | 814                       |
| <b>HG00514</b>    | <b>PRJNA300843</b> | <b>29,396,877</b> | <b>2,864,989,099</b> | <b>99.35</b>                   | <b>79.64</b>              | <b>99.28</b>               | <b>749</b>                |
| <b>CHM13</b>      | PRJNA369439        | 29,260,714        | 2,875,999,248        | 98.96                          | 79.61                     | 99.15                      | 732                       |
| <b>NA19240</b>    | PRJNA288807        | 29,140,631        | 2,866,746,472        | 99.22                          | 79.88                     | 99.20                      | 774                       |
| <b>HG00733</b>    | PRJNA483067        | 26,292,878        | 2,893,114,812        | 99.25                          | 81.19                     | 99.16                      | 758                       |
| <b>HG02059</b>    | <b>PRJNA339726</b> | <b>25,293,151</b> | <b>2,898,275,003</b> | <b>99.37</b>                   | <b>80.57</b>              | <b>99.30</b>               | <b>759</b>                |
| <b>HG02818</b>    | PRJNA339722        | 22,499,404        | 2,875,770,361        | 99.27                          | 76.78                     | 99.19                      | 707                       |
| <b>AK1_v2</b>     | <b>PRJNA298944</b> | <b>18,080,262</b> | <b>2,866,867,749</b> | <b>99.36</b>                   | <b>77.94</b>              | <b>99.30</b>               | <b>720</b>                |
| <b>HG002</b>      | PRJNA529552        | 16,145,298        | 2,957,656,065        | 98.40                          | 70.70                     | 98.97                      | 557                       |

The flanking sequences in HX1 were assembled by FALCON. There are a total of 1,192 HERA assembled regions in HX1, with a total length of 48.47 Mb, and a max length of 321,559 bp. Both types of sequences were aligned to each genome, and the average sequence identity and coverage were calculated. Note that the three Asian genomes AK1, HG02059 and HG00514 have the highest sequence identity with HX1 among the 10 genomes, consistent with their closer relationship to HX1 than other genomes.
